# Supplementary material for: Dual-functional coordination polymers with high proton conduction behaviour and good luminescence properties
Source: Royal Society of Chemistry journal article supplement (doi:10.1039/d1dt00932j), 2021-01-01
Supplement: d1dt00932j1.pdf [file d1dt00932j1.pdf]

## Supporting information

### Dual-functional coordination polymers with high proton conduction behavior and good luminescence properties

Xue-Ting Liu,<sup>a</sup> Bin-Cheng Wang,<sup>a</sup> Biao-Biao Hao,<sup>a</sup> Chen-Xi Zhang<sup>\*a,b</sup> and Qing-Lun Wang<sup>c,d</sup>

<sup>a</sup> College of Chemical Engineering and Materials Science, Tianjin University of Science and Technology, Tianjin 300457, P. R. China

<sup>b</sup> Key Laboratory of Brine Chemical Engineering and Resource Eco-utilization, Tianjin University of Science and Technology, Tianjin 300457, P. R. China

<sup>c</sup> College of Chemistry, Nankai University, Tianjin 300071, P. R. China.

<sup>d</sup> Key Laboratory of Advanced Energy Materials Chemistry (Ministry of Education), Nankai University, Tianjin 300071, P. R. China

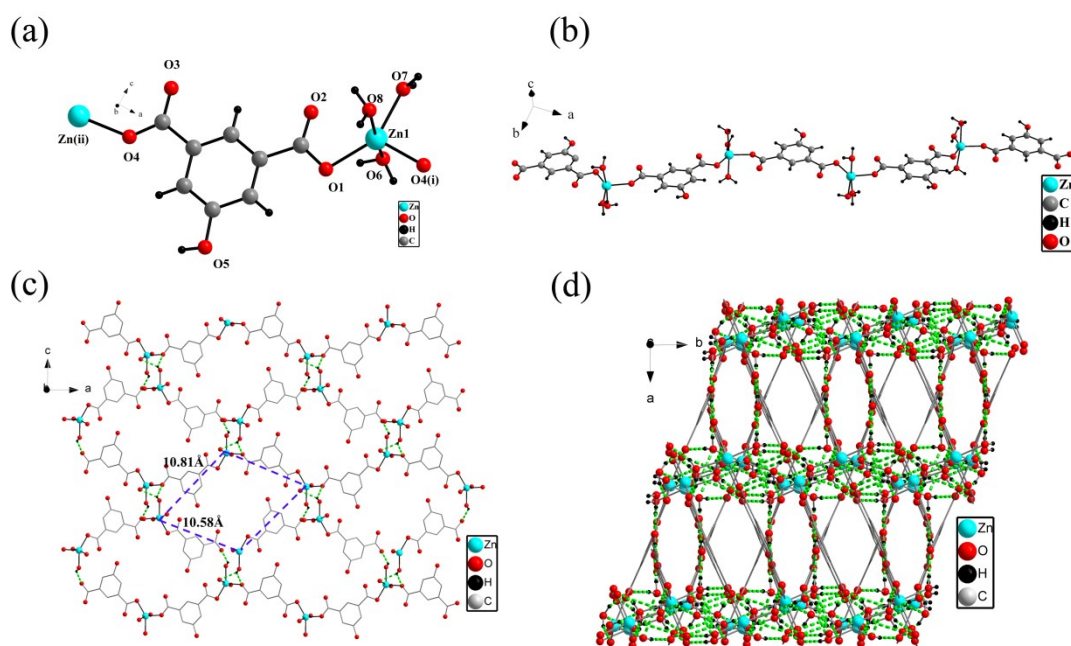

**Figure S1** (a) The ligand environment of complex **2** (Symmetry codes: (i) 0.5+x, -0.5+y, 1-z; (ii) -0.5+x, 0.5+y, 1-z), (b) 1D chain structure of complex **2**; (c) 2D planar structure of complex **2**; (d) 3D stacking diagram of complex **2** connected by hydrogen bonds.

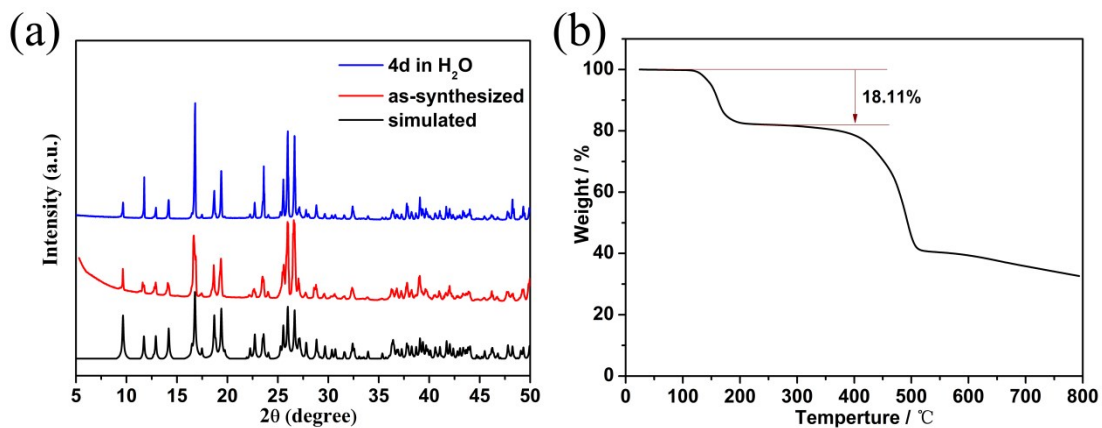

**Figure S2** (a) PXRD patterns of complex **2** for the simulated, as-synthesized and after water treated samples; (b) TG analysis profile of complex **2**.

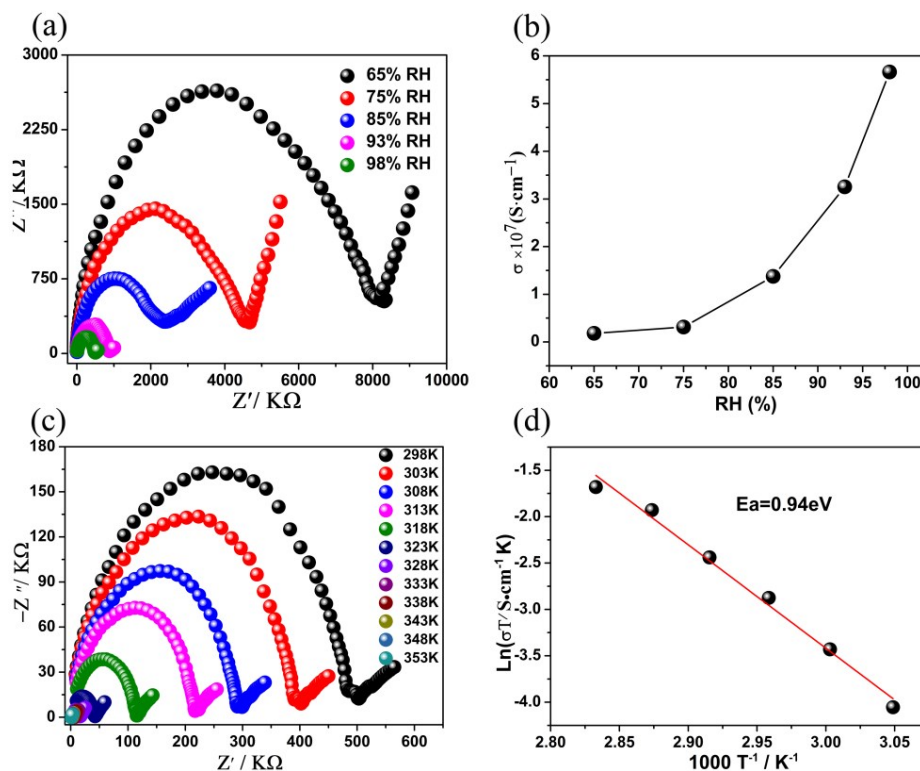

**Figure S3** (a) Impedance spectra of complex **2** at 298 K under different humidity; (b) The variation trend of proton conductivity of complex **2** with humidity at 298 K; (c) Impedance spectra of complex **2** at different temperature under 98% RH; (d) Arrhenius plot for activation energy of complex **2** at 98% RH.

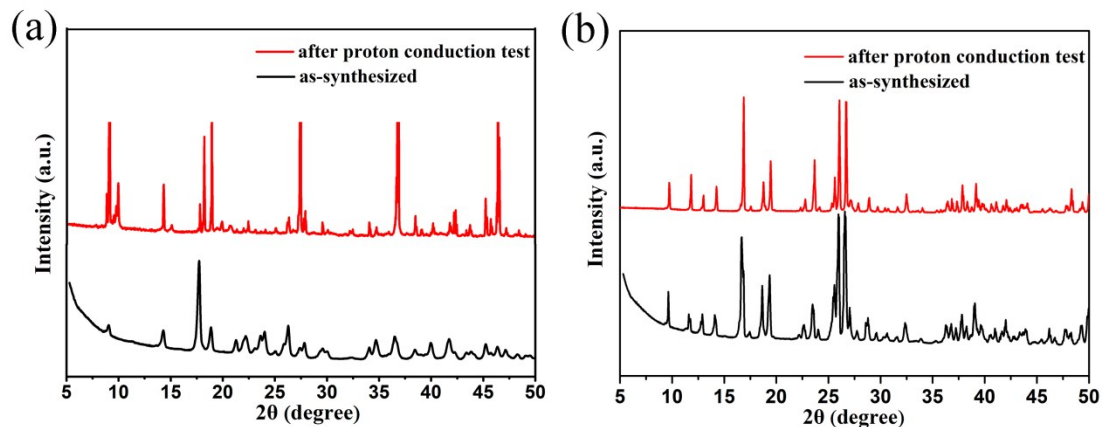

**Figure S4** (a) PXRD after proton conduction test of complex 1; (b) PXRD after proton conduction test of complex 2.

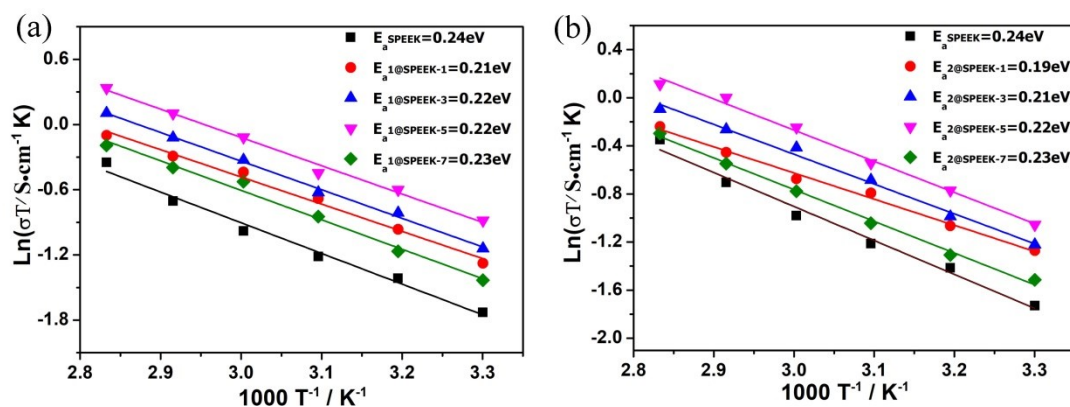

**Figure S5** (a) Arrhenius plots for activation energy of pure SPEEK membrane and 1@SPEEK-X under 98%RH; (b) Arrhenius plots for activation energy of pure SPEEK membrane and 2@SPEEK-X under 98% RH.

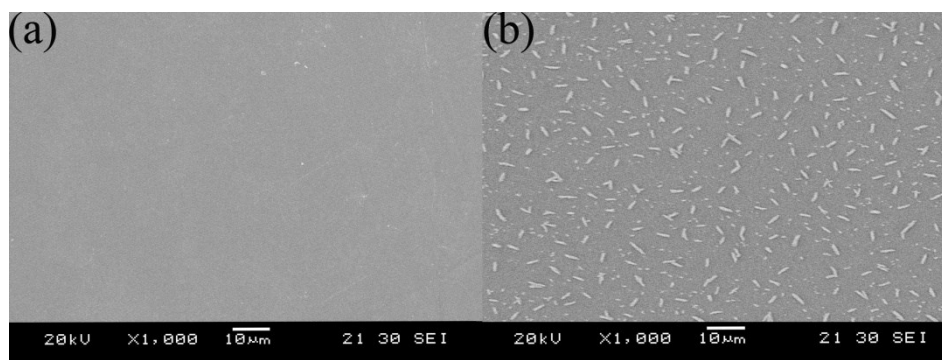

**Figure S6** Surface SEM images of (a) pure SPEEK membrane and (b) 2@SPEEK-5

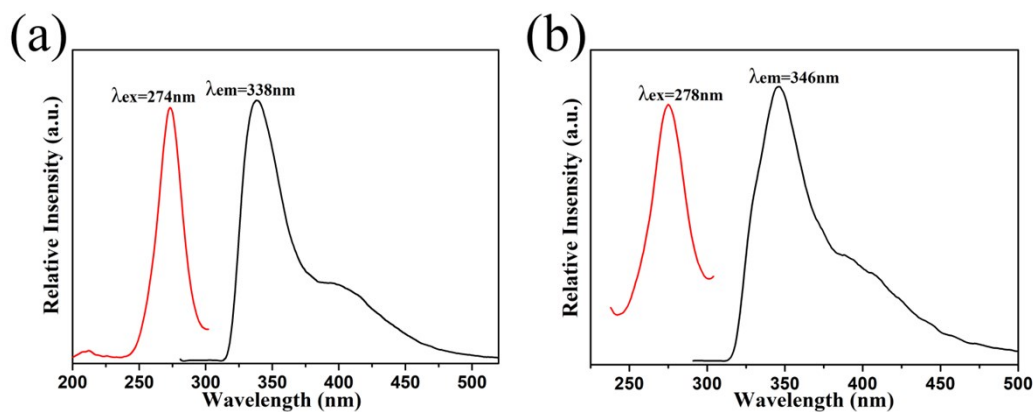

**Figure S7** The excitation and emission spectra of solid state fluorescence of (a) complex **1**, and (b) complex **2**.

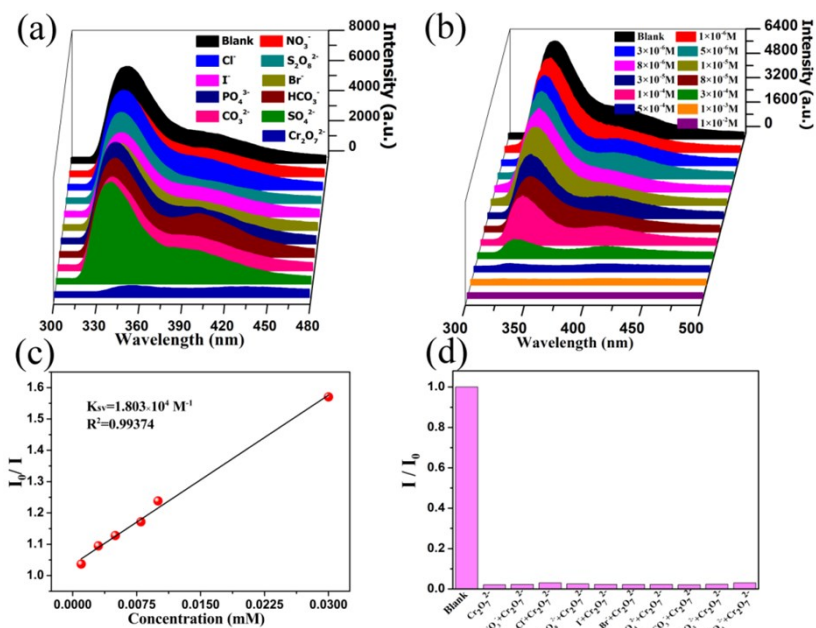

**Figure S8** Emission spectra of (a) complex **2** in different anion solutions; (b) complex **2** with different concentrations of  $\text{Cr}_2\text{O}_7^{2-}$  ions; (c) The Stern–Volmer plot of  $I_0/I$  versus the concentration of  $\text{Cr}_2\text{O}_7^{2-}$  ions for complex **2** at low concentration (from 0 to  $3 \times 10^{-5}$  M), (d) Complex **2** detected  $\text{Cr}_2\text{O}_7^{2-}$  ions in the presence of other anion solutions.

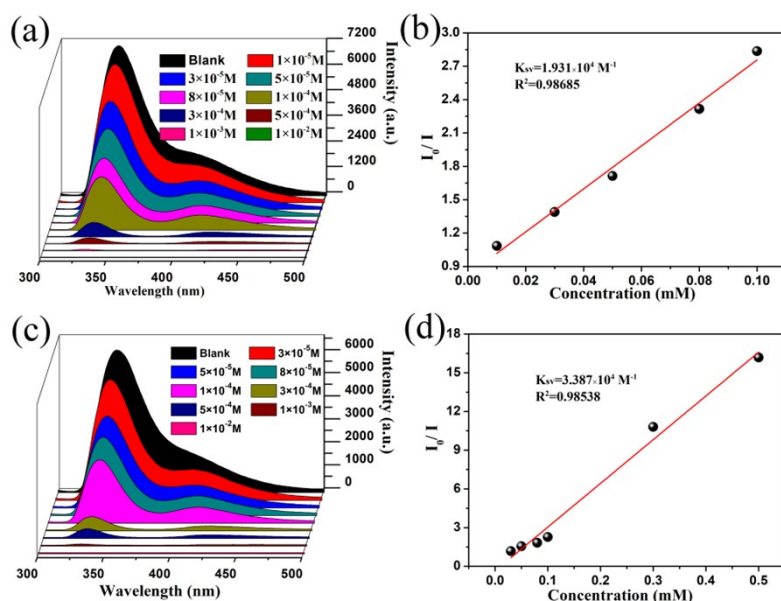

**Figure S9** Emission spectra of (a) complex 1 with different concentrations of  $\text{CrO}_4^{2-}$  ions; (b) The Stern–Volmer plot of  $I_0/I$  versus the concentration of  $\text{CrO}_4^{2-}$  ions for complex 1 at low concentration (from 0 to  $1 \times 10^{-4} \text{ M}$ ), (c) complex 2 with different concentrations of  $\text{CrO}_4^{2-}$  ions; (b) The Stern–Volmer plot of  $I_0/I$  versus the concentration of  $\text{CrO}_4^{2-}$  ions for complex 2 at low concentration (from 0 to  $5 \times 10^{-4} \text{ M}$ )

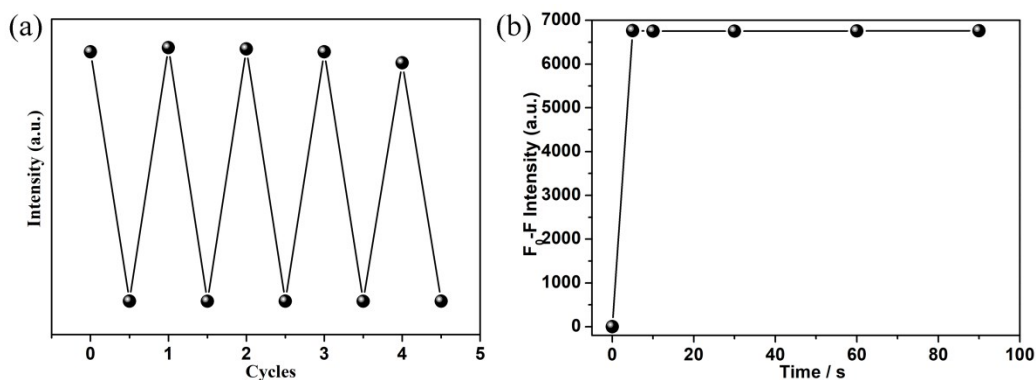

**Figure S10** (a) The fluorescence reversibility study of complex 1 within 5 cycles; (b) Time-dependent response of complex 1 for  $\text{Cr}_2\text{O}_7^{2-}$  ( $C = 1 \times 10^{-3} \text{ M}$ )



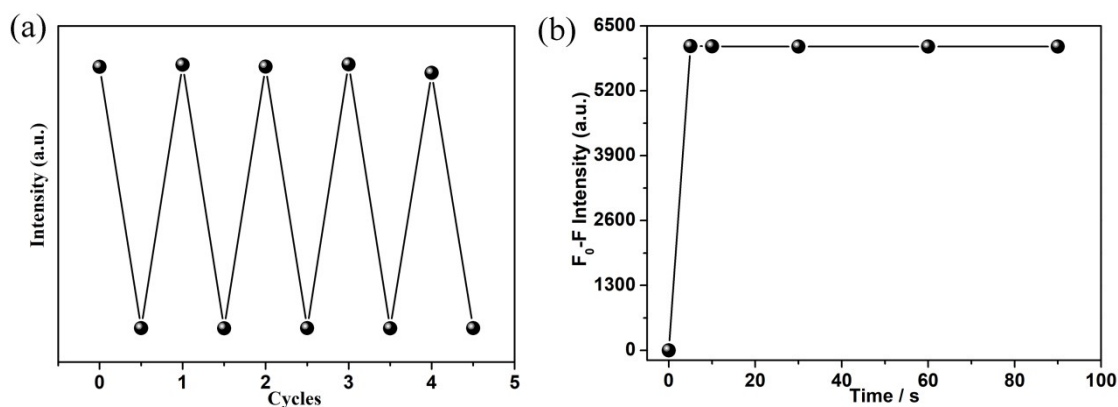

**Figure S11** (a) The fluorescence reversibility study of complex **2** within 5 cycles; (b) Time-dependent response of complex **2** for  $\text{Cr}_2\text{O}_7^{2-}$  ( $C=1\times 10^{-3}\text{M}$ )

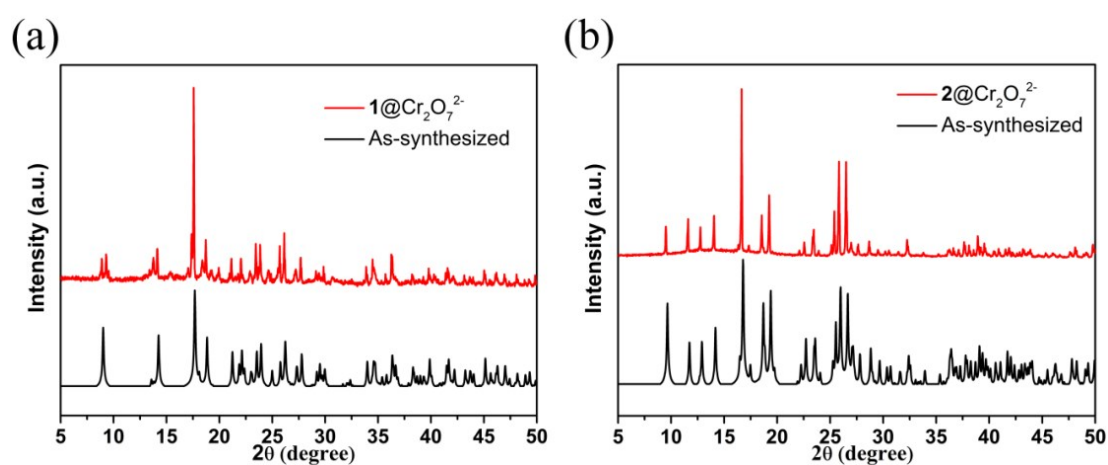

**Figure S12** (a) The PXRD patterns of complex **1** after soaking in  $\text{Cr}_2\text{O}_7^{2-}$  aqueous solution. (b) The PXRD patterns of complex **2** after soaking in  $\text{Cr}_2\text{O}_7^{2-}$  aqueous solution.

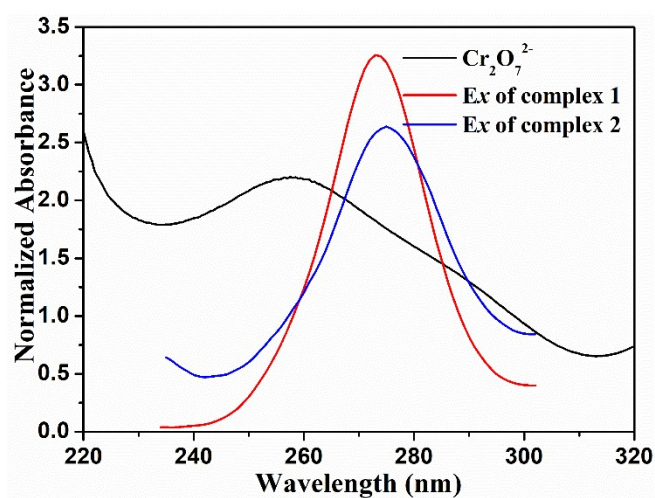

**Figure S13** The excitation spectra of complex **1**, complex **2** and UV-vis absorption spectrum of  $\text{Cr}_2\text{O}_7^{2-}$  ions.

**Table S1** The hydrogen bonds in complex 1

| Donor---H...Acceptor | D-H  | H...A | D...A | D-H...A |
|----------------------|------|-------|-------|---------|
| O(5)-H(5A)...O(2)    | 0.86 | 1.79  | 2.645 | 178     |
| O(6)-H(6A)...O(5)    | 0.86 | 1.89  | 2.748 | 178     |
| O(6)-H(6B)...O(3)    | 0.86 | 1.94  | 2.781 | 168     |
| O(7)-H(7A)...O(8)    | 0.86 | 2.18  | 2.947 | 149     |
| O(7)-H(7B)...O(3)    | 0.86 | 1.98  | 2.790 | 157     |
| O(7)-H(7B)...O(4)    | 0.86 | 2.46  | 3.103 | 132     |
| O(8)-H(8A)...O(1)    | 0.86 | 1.89  | 2.791 | 161     |
| O(8)-H(8B)...O(4)    | 0.85 | 2.08  | 2.870 | 154     |

**Table S2** The hydrogen bonds in complex 2

| Donor---H...Acceptor | D-H  | H...A | D...A | D-H...A |
|----------------------|------|-------|-------|---------|
| O(5)-H(5A)...O(2)    | 0.82 | 1.83  | 2.646 | 176     |
| O(6)-H(6A)...O(1)    | 0.85 | 1.84  | 2.642 | 158     |
| O(6)-H(6B)...O(3)    | 0.85 | 1.83  | 2.655 | 162     |
| O(7)-H(7A)...O(6)    | 0.85 | 1.95  | 2.794 | 174     |
| O(7)-H(7B)...O(8)    | 0.85 | 2.28  | 2.966 | 138     |
| O(7)-H(7B)...O(4)    | 0.85 | 2.49  | 3.227 | 145     |
| O(8)-H(8A)...O(3)    | 0.85 | 1.83  | 2.677 | 172     |
| O(8)-H(8B)...O(5)    | 0.85 | 1.86  | 2.710 | 177     |

**Table S3** The proton conduction of reported complexes in the literature

| Complexes                                                               | condition    | Proton conductivity<br>(S·cm <sup>-1</sup> ) | Ref.      |
|-------------------------------------------------------------------------|--------------|----------------------------------------------|-----------|
| [Cd(5-hip)(H <sub>2</sub> O) <sub>3</sub> ] <sub>n</sub>                | 98% RH, 343K | 1.53 × 10 <sup>-3</sup>                      | This work |
| [Zn(5-hip)(H <sub>2</sub> O) <sub>3</sub> ] <sub>n</sub>                | 98% RH, 353K | 5.27 × 10 <sup>-4</sup>                      | This work |
| HNU-38                                                                  | 98% RH, 353K | 1.45 × 10 <sup>-3</sup>                      | 1         |
| MOF-808                                                                 | 99% RH, 315K | 7.58 × 10 <sup>-3</sup>                      | 2         |
| VNU-23                                                                  | 90% RH, 343K | 1.54 × 10 <sup>-4</sup>                      | 3         |
| Zr <sub>6</sub> O <sub>4</sub> (OH) <sub>6</sub> (p-BDC) <sub>5,2</sub> | 95% RH, 338K | 2.63 × 10 <sup>-4</sup>                      | 4         |
| Zr <sub>6</sub> O <sub>4</sub> (OH) <sub>6</sub> (p-BDC) <sub>5</sub>   | 95% RH, 338K | 6.93 × 10 <sup>-3</sup>                      | 4         |
| MOF-801                                                                 | 98% RH, 298K | 1.88 × 10 <sup>-3</sup>                      | 5         |
| [Zn(L)Cl] <sub>n</sub>                                                  | 98% RH, 398K | 4.72 × 10 <sup>-3</sup>                      | 6         |
| FJU-80                                                                  | 98% RH, 353K | 1.05 × 10 <sup>-3</sup>                      | 7         |
| FJU-81                                                                  | 98% RH, 353K | 4.53 × 10 <sup>-3</sup>                      | 7         |

**Table S4** The proton conductivity,  $E_a$ , water uptake and area swelling of composite membrane

| Membrane  | Proton conductivity<br>( $S \cdot cm^{-1}$ ) | $E_a$<br>(eV) | Water uptake<br>(%) | Area swelling<br>(%) |
|-----------|----------------------------------------------|---------------|---------------------|----------------------|
| SPEEK     | $2.00 \times 10^{-3}$                        | 0.24          | 37.71               | 30.21                |
| 1@SPEEK-1 | $2.56 \times 10^{-3}$                        | 0.21          | 31.72               | 25.88                |
| 1@SPEEK-3 | $3.14 \times 10^{-3}$                        | 0.22          | 27.45               | 23.44                |
| 1@SPEEK-5 | $3.95 \times 10^{-3}$                        | 0.22          | 24.87               | 16.3                 |
| 1@SPEEK-7 | $2.34 \times 10^{-3}$                        | 0.23          | 20.63               | 14.23                |
| 2@SPEEK-1 | $2.23 \times 10^{-3}$                        | 0.19          | 30.75               | 24.51                |
| 2@SPEEK-3 | $2.58 \times 10^{-3}$                        | 0.21          | 26.57               | 18.21                |
| 2@SPEEK-5 | $3.17 \times 10^{-3}$                        | 0.22          | 20.02               | 13.25                |
| 2@SPEEK-7 | $2.11 \times 10^{-3}$                        | 0.23          | 17.2                | 11.89                |

**Table S5** The performance of reported complexes for detecting  $Cr_2O_7^{2-}$  in  $H_2O$ 

| Complexes                                                                 | $K_{sv}$ ( $M^{-1}$ ) | LOD ( $\mu M$ ) | Ref.      |
|---------------------------------------------------------------------------|-----------------------|-----------------|-----------|
| [Cd(5-hip)( $H_2O$ ) $_3$ ] $_n$                                          | $1.15 \times 10^4$    | 0.8             | This work |
| [Zn(5-hip)( $H_2O$ ) $_3$ ] $_n$                                          | $1.80 \times 10^4$    | 1               | This work |
| BUT-28                                                                    | $1.02 \times 10^5$    | 0.12            | 8         |
| BUT-39                                                                    | $1.57 \times 10^4$    | 1.5             | 9         |
| NU-1000                                                                   | $1.34 \times 10^4$    | 1.8             | 10        |
| [Ag(btx) $_{0.5}$ (DCTP) $_{0.5}$ ] $_n$                                  | $1.92 \times 10^4$    | 2.04            | 11        |
| [Cd $_3$ (cpota) $_2$ (phen) $_3$ ] $_n \cdot 5nH_2O$                     | $1.21 \times 10^3$    | 0.37            | 12        |
| [Eu $_2$ (tpbpc) $_4 \cdot CO_3 \cdot H_2O$ ] $_n \cdot DMF \cdot solven$ | $1.04 \times 10^4$    | 0.33            | 13        |
| [Cd(IPA)(3-PN)] $_n$                                                      | $2.91 \times 10^3$    | 12.02           | 14        |
| [Zn(ttz) $H_2O$ ] $_n$                                                    | $2.19 \times 10^3$    | 2               | 15        |
| [Zn(btz)] $_n$                                                            | $4.23 \times 10^3$    | 2               | 15        |
| [Y(BTC)(DMF) $_6$ ] $_n \cdot 0.1Eu$                                      | $4.52 \times 10^3$    | 0.04            | 16        |



## REFERENCE

1. Wang, F. X.; Ren, G. J.; Tian, R. J.; Pan, Q. H., Pillared-layer MOF Based on Template-directed Method Synthesis, Structure and Proton Conduction Properties. *Chinese J. Struct. Chem.* **2020**, *39* (7), 1337-1342.
2. Luo, H. B.; Wang, M.; Liu, S. X.; Xue, C.; Tian, Z. F.; Zou, Y.; Ren, X. M., Proton Conductance of a Superior Water-Stable Metal-Organic Framework and Its Composite Membrane with Poly(vinylidene fluoride). *Inorg. Chem.* **2017**, *56* (7), 4169-4175.
3. Nguyen, M. V.; Lo, T. H. N.; Luu, L. C.; Nguyen, H. T. T.; Tu, T. N., Enhancing proton conductivity in a metal-organic framework at  $T > 80$  °C by an anchoring strategy. *Journal of Mater. Chem. A* **2018**, *6* (4), 1816-1821.
4. Taylor, J. M.; Dekura, S.; Ikeda, R.; Kitagawa, H., Defect Control To Enhance Proton Conductivity in a Metal-Organic Framework. *Chem. Mater.* **2015**, *27* (7), 2286-2289.
5. Zhang, J.; Bai, H. J.; Ren, Q.; Luo, H. B.; Ren, X. M.; Tian, Z. F.; Lu, S., Extra Water- and Acid-Stable MOF-801 with High Proton Conductivity and Its Composite Membrane for Proton-Exchange Membrane. *ACS Appl. Mater. Interfaces* **2018**, *10* (34), 28656-28663.
6. Shi, Z. Q.; Ji, N. N.; Wang, M. H.; Li, G., A Comparative Study of Proton Conduction Between a 2D Zinc(II) MOF and Its Corresponding Organic Ligand. *Inorg. Chem.* **2020**, *59* (7), 4781-4789.
7. Que, Z.; Ye, Y.; Yang, Y.; Xiang, F.; Chen, S.; Huang, J.; Li, Y.; Liu, C.; Xiang, S.; Zhang, Z., Solvent-Assisted Modification to Enhance Proton Conductivity and Water Stability in Metal Phosphonates. *Inorg. Chem.* **2020**, *59* (6), 3518-3522.
8. Xu, M. M.; Kong, X. J.; He, T.; Wu, X. Q.; Xie, L. H.; Li, J. R., A Stable Zr(IV)-Based Metal-Organic Framework Constructed from C horizontal line C Bridged Di-isophthalate Ligand for Sensitive Detection of Cr<sub>2</sub>O<sub>7</sub>(<sup>2-</sup>) in Water. *Inorg Chem* **2018**, *57* (22), 14260-14268.
9. He, T.; Zhang, Y. Z.; Kong, X. J.; Yu, J.; Lv, X. L.; Wu, Y.; Guo, Z. J.; Li, J. R., Zr(IV)-Based Metal-Organic Framework with T-Shaped Ligand: Unique Structure, High Stability, Selective Detection, and Rapid Adsorption of Cr<sub>2</sub>O<sub>7</sub>(<sup>2-</sup>) in Water. *ACS Appl Mater Interfaces* **2018**, *10* (19), 16650-16659.
10. Lin, Z. J.; Zheng, H. Q.; Zheng, H. Y.; Lin, L. P.; Xin, Q.; Cao, R., Efficient Capture and Effective Sensing of Cr<sub>2</sub>O<sub>7</sub>(<sup>2-</sup>) from Water Using a Zirconium Metal-Organic Framework. *Inorg. Chem.* **2017**, *56* (22), 14178-14188.
11. Chang, H.-N.; Liu, L.-W.; Hao, Z. C.; Cui, G.-H., A 3D Ag(I) metal-organic framework for sensing luminescence and photocatalytic activities. *Journal of Molecular Structure* **2018**, *1155*, 496-502.
12. Li, S.; Lu, L.; Zhu, M.; Yuan, C.; Feng, S., A bifunctional chemosensor for detection of volatile ketone or hexavalent chromate anions in aqueous solution based on a Cd(II) metal-organic framework. *Sensors and Actuators B: Chemical* **2018**, *258*, 970-980.
13. Liu, J.; Ji, G.; Xiao, J.; Liu, Z., Ultrastable 1D Europium Complex for

Simultaneous and Quantitative Sensing of Cr(III) and Cr(VI) Ions in Aqueous Solution with High Selectivity and Sensitivity. *Inorg. Chem.* **2017**, *56* (7), 4197-4205.

14. Parmar, B.; Rachuri, Y.; Bisht, K. K.; Laiya, R.; Suresh, E., Mechanochemical and Conventional Synthesis of Zn(II)/Cd(II) Luminescent Coordination Polymers: Dual Sensing Probe for Selective Detection of Chromate Anions and TNP in Aqueous Phase. *Inorg. Chem.* **2017**, *56* (5), 2627-2638.

15. Cao, C.-S.; Hu, H.-C.; Xu, H.; Qiao, W.-Z.; Zhao, B., Two solvent-stable MOFs as a recyclable luminescent probe for detecting dichromate or chromate anions. *CrystEngComm* **2016**, *18* (23), 4445-4451.

16. Duan, T.-W.; Yan, B.; Weng, H., Europium activated yttrium hybrid microporous system for luminescent sensing toxic anion of Cr(VI) species. *Microporous and Mesoporous Materials* **2015**, *217*, 196-202.
